# Supplementary material
Source: publisher figshare collection journal article supplement (https://sage.figshare.com/ndownloader/files/14074310)

**Supplementary Figure 1: Dynamic changes in MFI of CD86 on 4 monocyte subsets in MG and NMG patients before and after CPB**

MFI: mean fluorescence intensity; CPB: cardiopulmonary bypass; MG: methylprednisolone group; NMG: non-methylprednisolone group

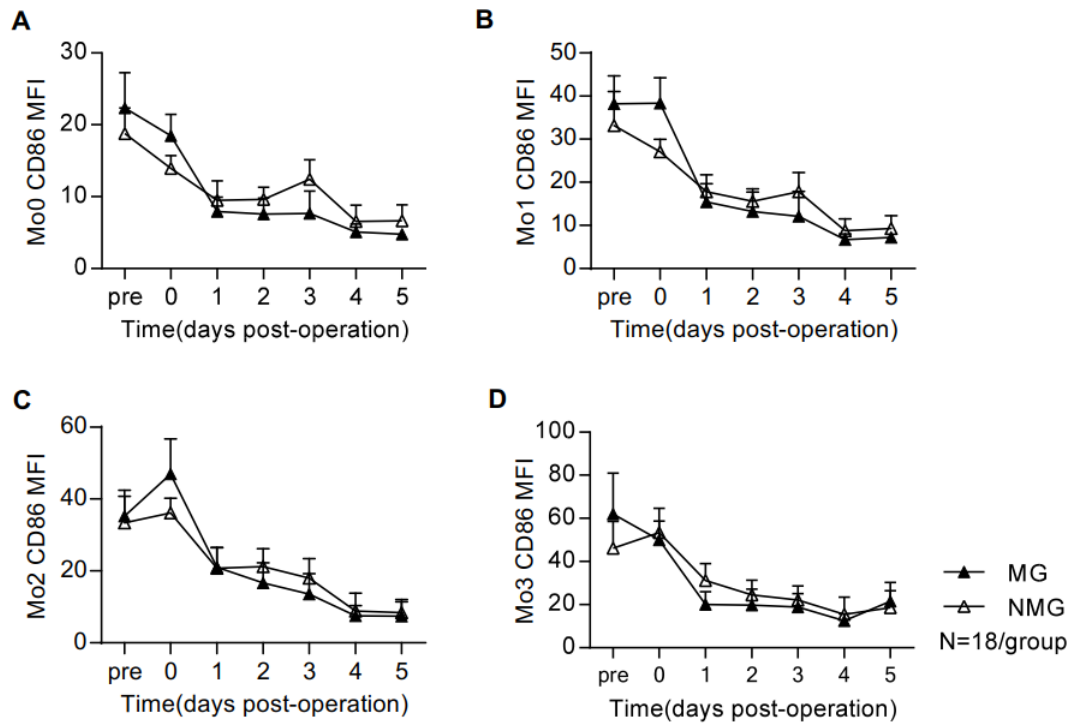

**Supplementary Figure 2:** Dynamic changes in MFI of CD64 on 4 monocyte subsets in MG and NMG patients before and after CPB

MFI: mean fluorescence intensity; CPB: cardiopulmonary bypass; MG: methylprednisolone group; NMG: non-methylprednisolone group

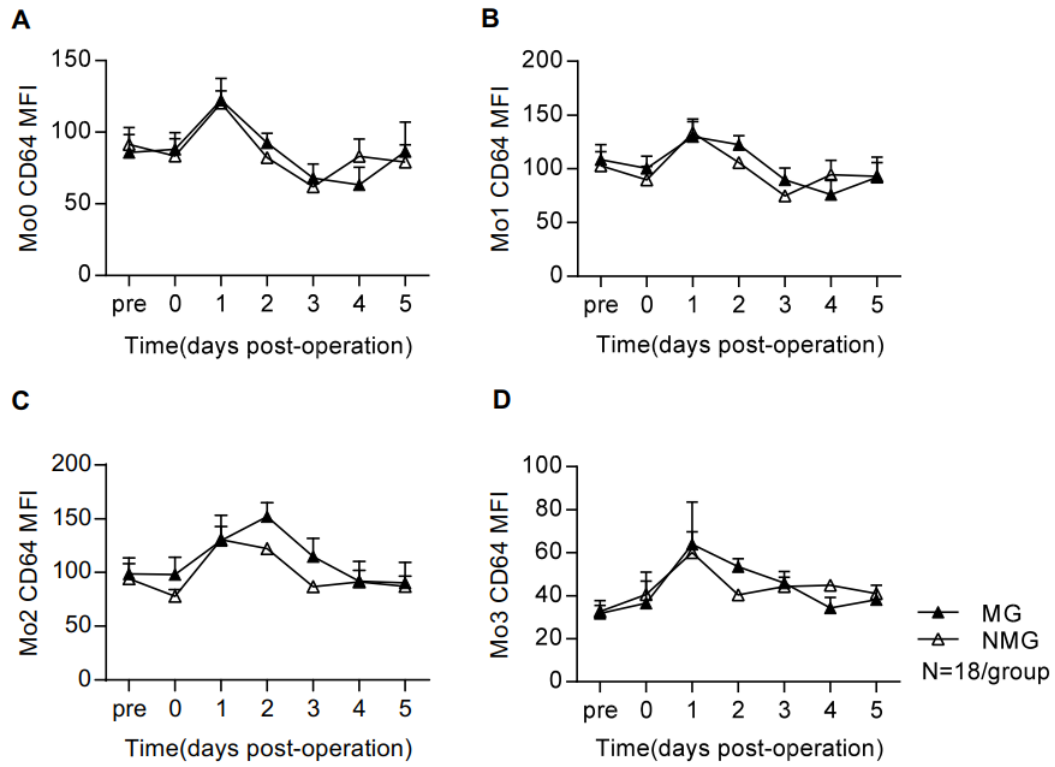

**Supplementary Figure 3:** Dynamic changes in MFI of TLR-4 on 4 monocyte subsets in MG and NMG patients before and after CPB

MFI: mean fluorescence intensity; CPB: cardiopulmonary bypass; MG: methylprednisolone group; NMG: non-methylprednisolone group

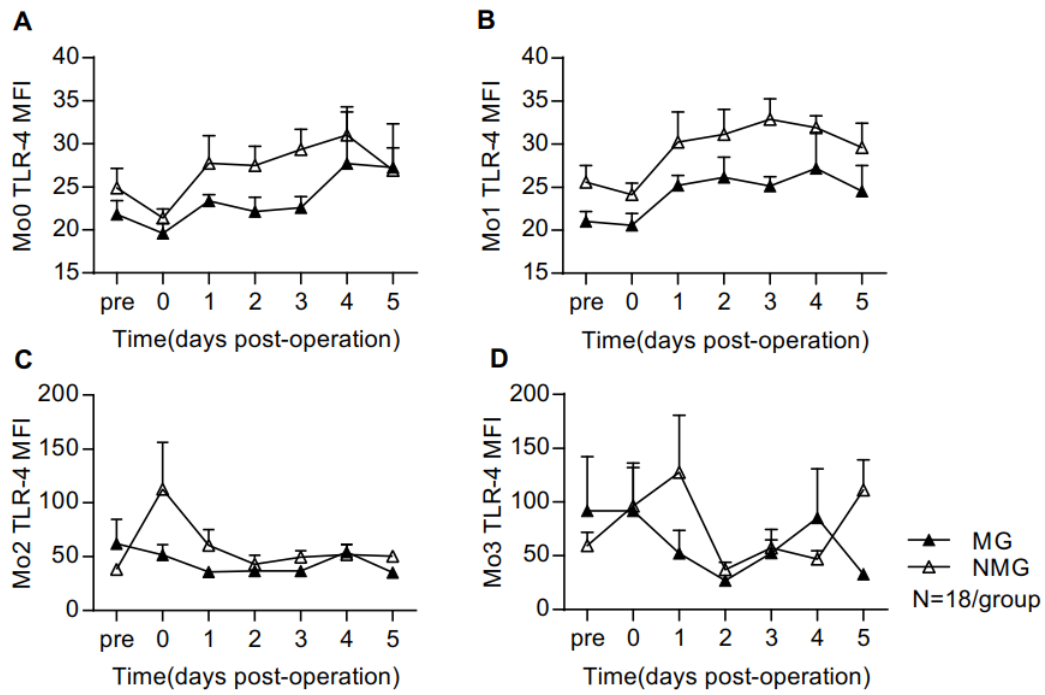

Supplement: Supplementary file 1 [file 14074310]
